# Supplementary material for: Lithography-free plasma-induced patterned growth of MoS2and its heterojunction with graphene
Source: Royal Society of Chemistry journal article supplement (doi:10.1039/c6nr03318k), 2016-01-01
Supplement: c6nr03318k1.pdf [file c6nr03318k1.pdf]

SUPPORTING INFORMATION

**Lithography-free plasma-induced patterned growth of MoS<sub>2</sub> and its  
heterojunction with graphene**

Xiang Chen, Yong Ju Park, Tanmoy Das, Houk Jang, Jaebok Lee and Jong-Hyun Ahn<sup>†</sup>

School of Electrical and Electronic Engineering, Yonsei University, 50 Yonsei-ro,  
Seodaemun-gu, Seoul 03722, Republic of Korea.

<sup>†</sup>E-mail: ahnj@yonsei.ac.kr

**Contents:**

Supplementary Figure S1-S4

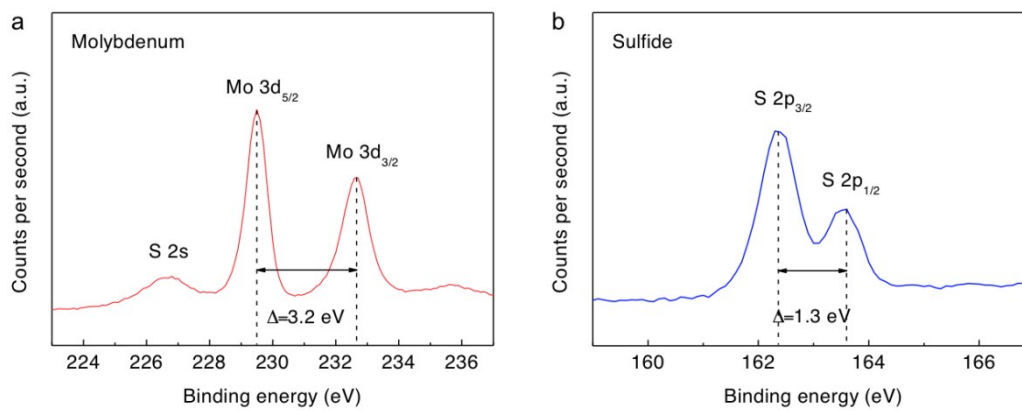

**Fig. S1** (a, b) X-ray photoemission spectroscopy (XPS) results of the binding energy for Molybdenum (a) and Sulfide (b) from patterned monolayer MoS<sub>2</sub>.

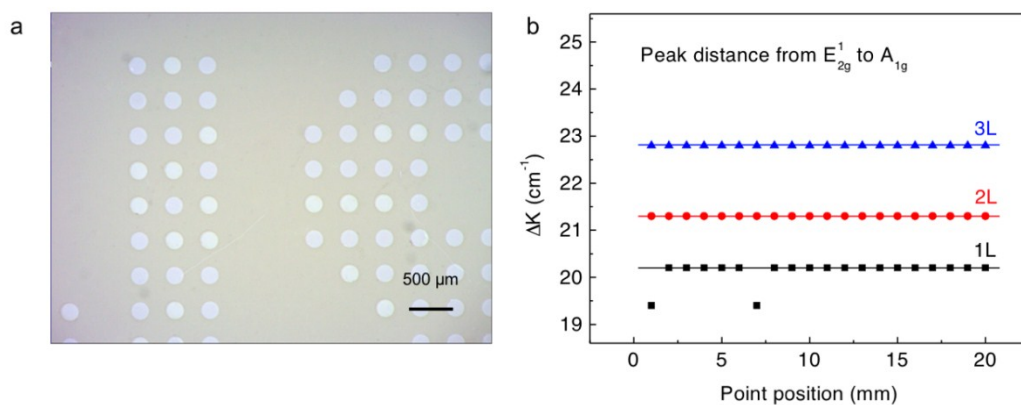

**Fig. S2** (a) Optical microscope image of a part of “YONSEI” mark consists of patterned MoS<sub>2</sub> layers in circle shape after transferred onto sapphire substrate. (b) Peak distances of E<sub>2g</sub><sup>1</sup> and A<sub>1g</sub> peaks for 20 measurement points from the patterned 1L-3L MoS<sub>2</sub> on SiO<sub>2</sub> substrate in size of 2 × 2 cm.

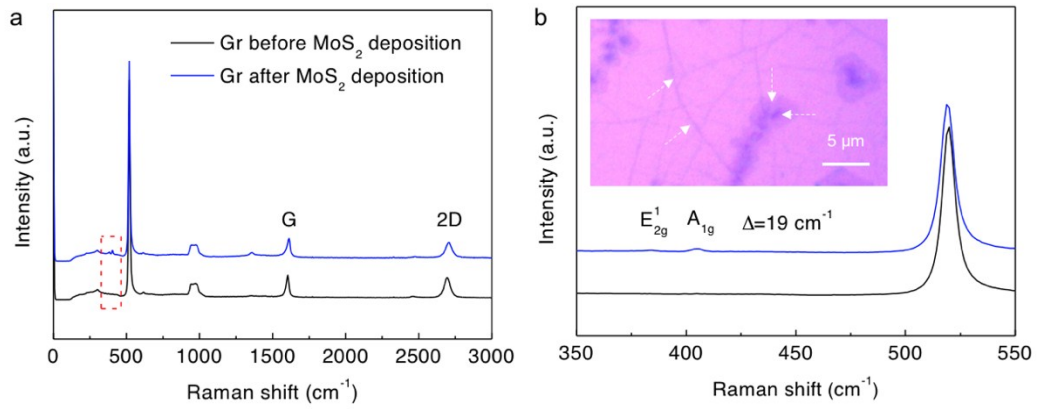

**Fig. S3** (a, b) Raman spectra of bilayer CVD graphene before and after  $\text{MoS}_2$  deposition in large (a) and small (b) ranges. Inset shows the optical microscope image of bilayer graphene after  $\text{MoS}_2$  growth, and  $\text{MoS}_2$  tends to grow along the wrinkles or on the 2L/3L graphene seeds.

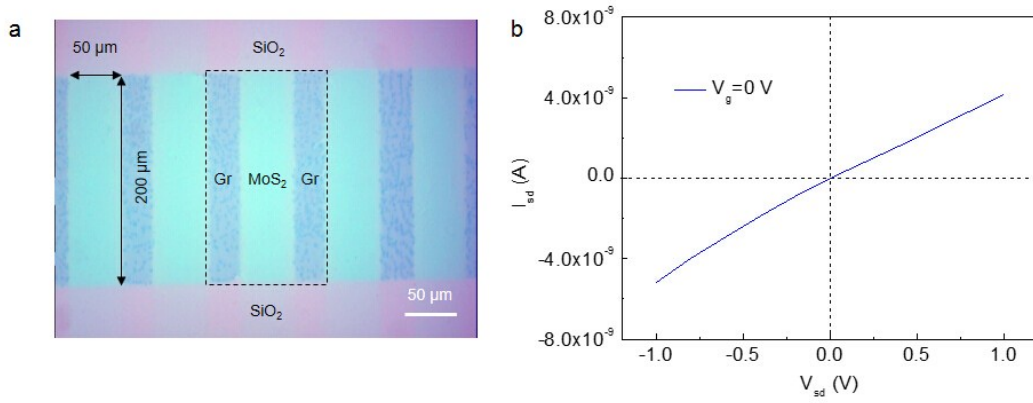

**Fig. S4** (a) Optical microscope image of a transistor unit composed of MoS<sub>2</sub> channel and graphene electrodes, as marked in the black box. The length and width of the MoS<sub>2</sub> channel are 50 μm and 200 μm, respectively. The top and bottom parts have been etched by using CHF<sub>3</sub>/O<sub>2</sub> plasma (35/10 sccm, 100 W, 6 s) with help of a shadow mask. (b) I-V electrical property of the transistor. The source-drain bias ( $V_{sd}$ ) was swept from -1 V to 1 V, and the back-gate voltage ( $V_g$ ) was 0 V.
